# Supplementary material for: Respirasome Proteins Are Regulated by Sex-Hormone Interactions in the Brain
Source: MDPI journal article supplement (doi:10.3390/ijms232314754), 2022-11-25
Supplement: s1 [file s1]

**Supplementary Table S1.** The top 3 PPI-enriched function in males vs females.

| PPI Cluster              | Gene Ontology   Description   Log10(p)                                                                                                                                                                     |
|--------------------------|------------------------------------------------------------------------------------------------------------------------------------------------------------------------------------------------------------|
| Fully connected Cluster  | GO:0051640   organelle localization   -10.3; GO:0051656   establishment of organelle localization   -8.9; GO:0097435   supramolecular fiber organization   -8.7                                            |
| Translation              | R-MMU-8953854   Metabolism of RNA   -9.6; R-MMU-195253   Degradation of beta-catenin by the destruction complex   -8.3; R-MMU-1799339   SRP-dependent cotranslational protein targeting to membrane   -8.0 |
| Neuron Adhesion          | R-MMU-422475   Axon guidance   -9.9; R-MMU-9675108   Nervous system development   -9.8; R-MMU-437239   Recycling pathway of L1   -8.2                                                                      |
| Golgi-ER Transport       | R-MMU-6807878   COPI-mediated anterograde transport   -5.8; R-MMU-8856688   Golgi-to-ER retrograde transport   -5.4; R-MMU-199977   ER to Golgi Anterograde Transport   -5.2                               |
| Mitochondrial Metabolism | ko00190   Oxidative phosphorylation   -11.0; mmu05012   Parkinson's disease   -10.8; ko04932   Non-alcoholic fatty liver disease (NAFLD)   -10.7                                                           |
| Vesicle Trafficking      | R-MMU-8876198   RAB GEFs exchange GTP for GDP on RABs   -7.1; R-MMU-9007101   Rab regulation of trafficking   -6.8; R-MMU-199991   Membrane Trafficking   -4.8                                             |
| Platelet Function        | R-MMU-114608   Platelet degranulation   -6.8; R-MMU-76005   Response to elevated platelet cytosolic Ca <sup>2+</sup>   -6.7; R-MMU-76002   Platelet activation, signaling and aggregation   -5.8           |

Full list of all enriched functions is in Supplementary File S2.

**Supplementary Table S2.** Top 20 STRING Enriched Functions regulated by Sex.

| # background genes | # genes | category              | description                                   | FDR value | p-value  | term name  |
|--------------------|---------|-----------------------|-----------------------------------------------|-----------|----------|------------|
| 10283              | 91      | GO Cellular Component | Cytoplasm                                     | 2.58E-18  | 1.05E-21 | GO:0005737 |
| 2050               | 41      | GO Cellular Component | Cell junction                                 | 1.97E-14  | 3.21E-17 | GO:0030054 |
| 1583               | 35      | GO Cellular Component | Neuron projection                             | 2.97E-13  | 8.46E-16 | GO:0043005 |
| 212                | 15      | GO Cellular Component | Myelin sheath                                 | 2.81E-11  | 9.15E-14 | GO:0043209 |
| 836                | 23      | GO Cellular Component | Cell body                                     | 6.2E-10   | 3.03E-12 | GO:0044297 |
| 1411               | 30      | GO Molecular Function | Protein-containing complex binding            | 2.52E-09  | 4.81E-13 | GO:0044877 |
| 1064               | 26      | GO Biological Process | Cytoskeleton organization                     | 1.06E-08  | 1.21E-12 | GO:0007010 |
| 761                | 20      | GO Cellular Component | Postsynapse                                   | 3.13E-08  | 2.16E-10 | GO:0098794 |
| 2438               | 37      | GO Biological Process | Regulation of cellular component organization | 4.01E-08  | 9.15E-12 | GO:0051128 |
| 4035               | 44      | GO Cellular Component | Intracellular non-membrane-bounded organelle  | 2.72E-07  | 2.21E-09 | GO:0043232 |
| 3573               | 40      | GO Cellular Component | Cytosol                                       | 9.64E-07  | 9.02E-09 | GO:0005829 |
| 1518               | 27      | GO Biological Process | Establishment of localization in cell         | 1.73E-06  | 4.95E-10 | GO:0051649 |
| 2806               | 36      | GO Biological Process | Regulation of localization                    | 5.65E-06  | 2.09E-09 | GO:0032879 |
| 861                | 18      | GO Cellular Component | Supramolecular fiber                          | 6.26E-06  | 6.11E-08 | GO:0099512 |
| 775                | 17      | GO Cellular Component | Perinuclear region of cytoplasm               | 7.05E-06  | 7.64E-08 | GO:0048471 |
| 354                | 12      | GO Cellular Component | Cell projection membrane                      | 7.74E-06  | 8.82E-08 | GO:0031253 |
| 438                | 13      | GO Cellular Component | Cell leading edge                             | 9.32E-06  | 1.1E-07  | GO:0031252 |
| 2021               | 29      | GO Molecular Function | Nucleotide binding                            | 1.29E-05  | 1.23E-08 | GO:0000166 |
| 607                | 16      | GO Biological Process | Regulation of neuron projection development   | 1.78E-05  | 1.65E-08 | GO:0010975 |
| 521                | 15      | GO Biological Process | Modulation of chemical synaptic transmission  | 1.78E-05  | 1.57E-08 | GO:0050804 |

Full list of all enriched functions is in Supplementary File S3.

**Supplementary Table S3.** The top 3 PPI-enriched function in gonads vs gonadectomy.

| PPI Cluster              | Gene Ontology   Description   Log10(p);                                                                                                                               |
|--------------------------|-----------------------------------------------------------------------------------------------------------------------------------------------------------------------|
| Fully connected Cluster  | GO:0032271   regulation of protein polymerization   -10.3; GO:0043254   regulation of protein-containing complex assembly   -10.2; ko01200   Carbon metabolism   -9.8 |
| Protein Folding          | GO:0006457   protein folding   -12.5; R-MMU-3371556   Cellular response to heat stress   -10.4; GO:0042026   protein refolding   -9.0                                 |
| Mitochondrial Metabolism | ko00640   Propanoate metabolism   -8.5; mmu00640   Propanoate metabolism   -8.4; ko00280   Valine, leucine and isoleucine degradation   -7.5                          |
| Cytoskeleton             | R-MMU-5689603   UCH proteinases   -6.9; R-MMU-5663213   RHO GTPases Activate WASPs and WAVES   -6.1; WP523   Regulation of actin cytoskeleton   -6.0                  |
| Endocytosis              | GO:0006898   receptor-mediated endocytosis   -14.2; GO:0072583   clathrin-dependent endocytosis   -14.2; R-MMU-8856828   Clathrin-mediated endocytosis   -13.8        |
| Translation              | ko03010   Ribosome   -13.0; mmu03010   Ribosome   -13.0; R-MMU-1799339   SRP-dependent cotranslational protein targeting to membrane   -12.4                          |
| Vesicle Trafficking      | R-MMU-199991   Membrane Trafficking   -4.8; R-MMU-5653656   Vesicle-mediated transport   -4.7                                                                         |

Full list of all enriched functions is in Supplementary File S2.

**Supplementary Table S4.** Top 20 STRING Enriched Functions regulated by Gonadectomy.

| # background genes | # genes | category              | description                          | FDR value | p-value  | term name   |
|--------------------|---------|-----------------------|--------------------------------------|-----------|----------|-------------|
| 212                | 24      | GO Cellular Component | Myelin sheath                        | 6.03E-23  | 2.45E-26 | GO:0043209  |
| 1492               | 36      | GO Cellular Component | Synapse                              | 1.96E-18  | 7.97E-22 | GO:0045202  |
| 10283              | 89      | GO Cellular Component | Cytoplasm                            | 4.98E-18  | 4.05E-21 | GO:0005737  |
| 1776               | 33      | GO Cellular Component | Mitochondrion                        | 1.44E-10  | 4.70E-13 | GO:0005739  |
| 1779               | 33      | Reactome Pathways     | Metabolism                           | 8.55E-09  | 4.92E-13 | MMU-1430728 |
| 2021               | 33      | GO Molecular Function | Nucleotide binding                   | 2.61E-08  | 1.52E-11 | GO:0000166  |
| 11084              | 66      | GO Cellular Component | Intracellular organelle              | 3.12E-08  | 7.62E-11 | GO:0043229  |
| 485                | 15      | GO Cellular Component | Cytoplasmic vesicle membrane         | 4.98E-08  | 1.62E-10 | GO:0030659  |
| 446                | 14      | GO Cellular Component | Neuron to neuron synapse             | 1.11E-07  | 5.89E-10 | GO:0098984  |
| 1080               | 20      | GO Cellular Component | Somatodendritic compartment          | 1.16E-07  | 7.07E-10 | GO:0036477  |
| 32                 | 7       | KEGG Pathways         | Citrate cycle (TCA cycle)            | 1.48E-07  | 3.41E-10 | mmu00020    |
| 689                | 20      | GO Biological Process | Cellular amide metabolic process     | 1.55E-07  | 2.65E-11 | GO:0043603  |
| 947                | 21      | GO Molecular Function | Cytoskeletal protein binding         | 7.25E-07  | 9.71E-10 | GO:0008092  |
| 223                | 12      | GO Biological Process | Regulation of protein polymerization | 9.64E-07  | 4.96E-10 | GO:0032271  |
| 2277               | 32      | GO Molecular Function | Enzyme binding                       | 9.91E-07  | 1.52E-09 | GO:0019899  |
| 244                | 10      | GO Cellular Component | Synaptic vesicle                     | 1.85E-06  | 1.86E-08 | GO:0008021  |
| 19                 | 5       | GO Cellular Component | Clathrin coat of coated pit          | 1.85E-06  | 1.81E-08 | GO:0030132  |
| 978                | 20      | GO Biological Process | Regulation of protein localization   | 2.25E-06  | 1.29E-10 | GO:0032880  |
| 1411               | 24      | GO Molecular Function | Protein-containing complex binding   | 3.96E-06  | 8.74E-09 | GO:0044877  |
| 1130               | 20      | GO Biological Process | Vesicle-mediated transport           | 5.41E-06  | 1.53E-09 | GO:0016192  |

Full list of all enriched functions is in Supplementary File S3.

**Supplementary Table S5.** The top 3 PPI-enriched function in Tibolone vs Control.

| PPI Cluster              | Gene Ontology   Description   Log10(p);                                                                                                                                                                                                                  |
|--------------------------|----------------------------------------------------------------------------------------------------------------------------------------------------------------------------------------------------------------------------------------------------------|
| Fully connected Cluster  | GO:0006091   generation of precursor metabolites and energy   -11.9; ko05010   Alzheimer's disease   -11.3; mmu05010   Alzheimer's disease   -11.3                                                                                                       |
| Transcription Regulation | R-MMU-382551   Transport of small molecules   -6.8; R-MMU-195253   Degradation of beta-catenin by the destruction complex   -6.6; R-MMU-8878159   Transcriptional regulation by RUNX3   -6.6                                                             |
| Citric Acid Cycle        | R-MMU-1428517   The citric acid (TCA) cycle and respiratory electron transport   -9.3; GO:0009060   aerobic respiration   -7.5; GO:0006091   generation of precursor metabolites and energy   -6.9                                                       |
| Translation              | R-MMU-1799339   SRP-dependent cotranslational protein targeting to membrane   -22.1; R-MMU-975956   Nonsense Mediated Decay (NMD) independent of the Exon Junction Complex (EJC)   -22.0; R-MMU-72689   Formation of a pool of free 40S subunits   -21.6 |
| Mitochondrial Metabolism | GO:0015980   energy derivation by oxidation of organic compounds   -6.3; R-MMU-109606   Intrinsic Pathway for Apoptosis   -5.9; GO:0009060   aerobic respiration   -5.8                                                                                  |
| mRNA Splicing            | R-MMU-72163   mRNA Splicing - Major Pathway   -13.7; R-MMU-72172   mRNA Splicing   -13.6; R-MMU-72203   Processing of Capped Intron-Containing Pre-mRNA   -12.8                                                                                          |
| Endocytosis              | R-MMU-8856828   Clathrin-mediated endocytosis   -9.6; GO:0072583   clathrin-dependent endocytosis   -9.2; R-MMU-199991   Membrane Trafficking   -8.7                                                                                                     |
| Statin Pathways          | WP1   Statin pathway   -9.2; GO:0010875   positive regulation of cholesterol efflux   -8.5; R-MMU-2173782   Binding and Uptake of Ligands by Scavenger Receptors   -8.4                                                                                  |

Full list of all enriched functions is in Supplementary File S2.

**Supplementary Table S6.** Top 20 STRING Enriched Functions regulated by Tibolone.

| # background genes | # genes | category              | description                                                    | FDR value | p-value  | term name   |
|--------------------|---------|-----------------------|----------------------------------------------------------------|-----------|----------|-------------|
| 10283              | 96      | GO Cellular Component | Cytoplasm                                                      | 3.11E-18  | 1.27E-21 | GO:0005737  |
| 1492               | 30      | GO Cellular Component | Synapse                                                        | 2.76E-16  | 1.63E-19 | GO:0045202  |
| 212                | 18      | GO Cellular Component | Myelin sheath                                                  | 4.03E-14  | 4.32E-17 | GO:0043209  |
| 1776               | 37      | GO Cellular Component | Mitochondrion                                                  | 3.11E-12  | 7.60E-15 | GO:0005739  |
| 761                | 24      | GO Cellular Component | Postsynapse                                                    | 7.38E-11  | 2.70E-13 | GO:0098794  |
| 3573               | 49      | GO Cellular Component | Cytosol                                                        | 1.37E-10  | 5.58E-13 | GO:0005829  |
| 122                | 12      | KEGG Pathways         | Carbon metabolism                                              | 8.96E-10  | 1.97E-12 | mmu01200    |
| 4895               | 56      | GO Cellular Component | Protein-containing complex                                     | 1.47E-09  | 7.17E-12 | GO:0032991  |
| 32                 | 8       | KEGG Pathways         | Citrate cycle (TCA cycle)                                      | 3.23E-09  | 1.42E-11 | mmu00020    |
| 167                | 14      | Reactome Pathways     | The citric acid (TCA) cycle and respiratory electron transport | 3.39E-09  | 1.95E-13 | MMU-1428517 |
| 697                | 21      | GO Cellular Component | Mitochondrial envelope                                         | 4.17E-09  | 2.38E-11 | GO:0005740  |
| 1083               | 25      | GO Cellular Component | Membrane protein complex                                       | 7.74E-09  | 5.98E-11 | GO:0098796  |
| 1536               | 29      | KEGG Pathways         | Metabolic pathways                                             | 2.14E-08  | 1.41E-10 | mmu01100    |
| 501                | 14      | GO Cellular Component | Glutamatergic synapse                                          | 2.14E-08  | 7.56E-11 | GO:0098978  |
| 319                | 16      | GO Biological Process | Generation of precursor metabolites and energy                 | 4.93E-08  | 5.64E-12 | GO:0006091  |
| 2472               | 36      | GO Cellular Component | Cell projection                                                | 6.43E-08  | 5.76E-10 | GO:0042995  |
| 449                | 16      | GO Cellular Component | Postsynaptic specialization                                    | 7.66E-08  | 7.17E-10 | GO:0099572  |
| 264                | 13      | KEGG Pathways         | Prion disease                                                  | 8.83E-08  | 7.78E-10 | mmu05020    |
| 1080               | 23      | GO Cellular Component | Somatodendritic compartment                                    | 1.82E-07  | 1.85E-09 | GO:0036477  |
| 636                | 14      | GO Cellular Component | Presynapse                                                     | 2.94E-07  | 1.56E-09 | GO:0098793  |

Full list of all enriched functions is in Supplementary File S3.

**Supplementary Table S7.** The top 3 PPI-enriched function regulated by Sex-Gonad interactions.

| PPI Cluster              | Gene Ontology   Description   Log10(p);                                                                                                                                                                                                     |
|--------------------------|---------------------------------------------------------------------------------------------------------------------------------------------------------------------------------------------------------------------------------------------|
| Fully connected Cluster  | R-MMU-927802   Nonsense-Mediated Decay (NMD)   -9.5; R-MMU-975957   Nonsense Mediated Decay (NMD) enhanced by the Exon Junction Complex (EJC)   -9.5; R-MMU-1799339   SRP-dependent cotranslational protein targeting to membrane   -9.1    |
| Protein Folding          | R-MMU-927802   Nonsense-Mediated Decay (NMD)   -21.8; R-MMU-975957   Nonsense Mediated Decay (NMD) enhanced by the Exon Junction Complex (EJC)   -21.8; R-MMU-1799339   SRP-dependent cotranslational protein targeting to membrane   -19.8 |
| Mitochondrial Metabolism | R-MMU-611105   Respiratory electron transport   -16.5; WP295   Electron transport chain   -16.3; CORUM:381   Respiratory chain complex I, mitochondrial   -15.8                                                                             |
| Cytoskeleton             | WP163   Cytoplasmic ribosomal proteins   -13.2; ko03010   Ribosome   -11.6; mmu03010   Ribosome   -11.6                                                                                                                                     |
| Endocytosis              | R-MMU-195253   Degradation of beta-catenin by the destruction complex   -12.2; R-MMU-201681   TCF dependent signaling in response to WNT   -10.7; R-MMU-195721   Signaling by WNT   -9.8                                                    |
| Translation              | mmu03050   Proteasome   -8.0; ko03050   Proteasome   -8.0; R-MMU-1236978   Cross-presentation of soluble exogenous antigens (endosomes)   -7.9                                                                                              |
| Protein Trafficking      | R-MMU-72163   mRNA Splicing - Major Pathway   -6.2; R-MMU-72172   mRNA Splicing   -6.2; R-MMU-72203   Processing of Capped Intron-Containing Pre-mRNA   -5.9                                                                                |
| Protein Phosphorylation  | R-MMU-8957275   Post-translational protein phosphorylation   -6.8; R-MMU-381426   Regulation of Insulin-like Growth Factor (IGF) transport and uptake by Insulin-like Growth Factor Binding Proteins (IGFBPs)   -6.7                        |

Full list of all enriched functions is in Supplementary File S2.

**Supplementary Table S8.** Top 20 STRING Enriched Functions regulated by Sex and Gonadectomy.

| # background genes | # genes | category              | description                                               | FDR value | p-value  | term name   |
|--------------------|---------|-----------------------|-----------------------------------------------------------|-----------|----------|-------------|
| 10283              | 104     | GO Cellular Component | Cytoplasm                                                 | 4.14E-17  | 1.68E-20 | GO:0005737  |
| 1492               | 43      | GO Cellular Component | Synapse                                                   | 4.14E-17  | 2.17E-20 | GO:0045202  |
| 2387               | 43      | GO Cellular Component | Plasma membrane bounded cell projection                   | 7.30E-11  | 3.86E-13 | GO:0120025  |
| 3573               | 50      | GO Cellular Component | Cytosol                                                   | 3.55E-09  | 2.60E-11 | GO:0005829  |
| 636                | 20      | GO Cellular Component | Presynapse                                                | 4.09E-08  | 3.16E-10 | GO:0098793  |
| 2973               | 42      | GO Cellular Component | Organelle membrane                                        | 1.96E-07  | 1.76E-09 | GO:0031090  |
| 4895               | 56      | GO Cellular Component | Protein-containing complex                                | 2.33E-07  | 2.18E-09 | GO:0032991  |
| 1962               | 35      | GO Molecular Function | Identical protein binding                                 | 2.92E-07  | 1.68E-10 | GO:0042802  |
| 1776               | 31      | GO Cellular Component | Mitochondrion                                             | 4.30E-07  | 4.20E-09 | GO:0005739  |
| 743                | 20      | GO Cellular Component | Neuronal cell body                                        | 4.30E-07  | 4.24E-09 | GO:0043025  |
| 99                 | 9       | GO Cellular Component | Cytosolic ribosome                                        | 6.22E-07  | 6.83E-09 | GO:0022626  |
| 2406               | 38      | GO Molecular Function | Small molecule binding                                    | 8.88E-07  | 6.80E-10 | GO:0036094  |
| 4054               | 48      | GO Cellular Component | Non-membrane-bounded organelle                            | 2.05E-06  | 2.34E-08 | GO:0043228  |
| 212                | 11      | GO Cellular Component | Myelin sheath                                             | 2.88E-06  | 3.40E-08 | GO:0043209  |
| 58                 | 7       | GO Cellular Component | Intercalated disc                                         | 4.74E-06  | 5.79E-08 | GO:0014704  |
| 1310               | 24      | GO Cellular Component | Plasma membrane region                                    | 1.04E-05  | 1.43E-07 | GO:0098590  |
| 1131               | 22      | GO Cellular Component | Organelle envelope                                        | 1.34E-05  | 1.91E-07 | GO:0031967  |
| 1779               | 31      | Reactome Pathways     | Metabolism                                                | 1.66E-05  | 4.37E-09 | MMU-1430728 |
| 399                | 13      | GO Cellular Component | Distal axon                                               | 2.22E-05  | 3.44E-07 | GO:0150034  |
| 58                 | 7       | KEGG Pathways         | Endocrine and other factor-regulated calcium reabsorption | 2.63E-05  | 5.79E-08 | mmu04961    |

Full list of all enriched functions is in Supplementary File S3.

**Supplementary Table S9.** The top 3 PPI-enriched function regulated by Sex-Tibolone interactions.

| PPI Cluster              | Gene Ontology   Description   Log10(p);                                                                                                                                      |
|--------------------------|------------------------------------------------------------------------------------------------------------------------------------------------------------------------------|
| Fully connected Cluster  | mmu05012   Parkinson's disease   -9.4; R-MMU-1428517   The citric acid (TCA) cycle and respiratory electron transport   -8.6; WP295   Electron transport chain   -8.4        |
| Citric Acid Cycle        | M00009   Citrate cycle (TCA cycle, Krebs cycle)   -6.4; mmu_M00009   Citrate cycle (TCA cycle, Krebs cycle)   -6.4; ko00020   Citrate cycle (TCA cycle)   -6.0               |
| Translation              | WP163   Cytoplasmic ribosomal proteins   -12.6; ko03010   Ribosome   -11.0; mmu03010   Ribosome   -11.0                                                                      |
| Electron Transport Chain | CORUM:381   Respiratory chain complex I, mitochondrial   -16.6; CORUM:382   Respiratory chain complex I, mitochondrial   -16.4; R-MMU-6799198   Complex I biogenesis   -15.5 |
| LTD and E2 signalling    | ko04730   Long-term depression   -9.0; mmu04730   Long-term depression   -9.0; ko04915   Estrogen signaling pathway   -8.2                                                   |
| AKT and Proteosome       | R-MMU-1257604   PIP3 activates AKT signaling   -7.9; R-MMU-9006925   Intracellular signaling by second messengers   -7.7; ko03050   Proteasome   -7.4                        |

Full list of all enriched functions is in Supplementary File S2.

**Supplementary Table S10.** Top 20 STRING Enriched Functions regulated by Sex and Tibolone.

| # background genes | # genes | category              | description                      | FDR value | p-value  | term name   |
|--------------------|---------|-----------------------|----------------------------------|-----------|----------|-------------|
| 10283              | 120     | GO Cellular Component | Cytoplasm                        | 1.22E-23  | 4.95E-27 | GO:0005737  |
| 1492               | 46      | GO Cellular Component | Synapse                          | 7.48E-18  | 6.09E-21 | GO:0045202  |
| 1776               | 42      | GO Cellular Component | Mitochondrion                    | 2.16E-12  | 5.28E-15 | GO:0005739  |
| 2472               | 49      | GO Cellular Component | Cell projection                  | 3.81E-12  | 1.09E-14 | GO:0042995  |
| 359                | 19      | KEGG Pathways         | Alzheimer disease                | 5.17E-10  | 1.14E-12 | mmu05010    |
| 3573               | 54      | GO Cellular Component | Cytosol                          | 2.33E-09  | 1.52E-11 | GO:0005829  |
| 1779               | 39      | Reactome Pathways     | Metabolism                       | 1.23E-08  | 7.10E-13 | MMU-1430728 |
| 2973               | 47      | GO Cellular Component | Organelle membrane               | 1.94E-08  | 1.42E-10 | GO:0031090  |
| 4895               | 62      | GO Cellular Component | Protein-containing complex       | 3.89E-08  | 3.48E-10 | GO:0032991  |
| 1962               | 38      | GO Molecular Function | Identical protein binding        | 1.01E-07  | 5.83E-11 | GO:0042802  |
| 435                | 17      | GO Cellular Component | Mitochondrial inner membrane     | 1.65E-07  | 1.68E-09 | GO:0005743  |
| 2021               | 38      | GO Molecular Function | Nucleotide binding               | 1.78E-07  | 1.36E-10 | GO:0000166  |
| 501                | 18      | GO Cellular Component | Glutamatergic synapse            | 1.82E-07  | 1.93E-09 | GO:0098978  |
| 3822               | 55      | GO Biological Process | Regulation of biological quality | 5.23E-07  | 5.97E-11 | GO:0065008  |
| 1080               | 25      | GO Cellular Component | Somatodendritic compartment      | 6.67E-07  | 7.33E-09 | GO:0036477  |
| 2115               | 39      | GO Biological Process | Cellular localization            | 7.37E-07  | 1.26E-10 | GO:0051641  |
| 212                | 12      | GO Cellular Component | Myelin sheath                    | 8.64E-07  | 1.01E-08 | GO:0043209  |
| 1872               | 33      | GO Cellular Component | Cytoplasmic vesicle              | 1.23E-06  | 1.51E-08 | GO:0031410  |
| 104                | 9       | GO Cellular Component | Oxidoreductase complex           | 1.93E-06  | 2.52E-08 | GO:1990204  |
| 414                | 15      | GO Cellular Component | Postsynaptic density             | 2.91E-06  | 4.26E-08 | GO:0014069  |

Full list of all enriched functions is in Supplementary File S3.

**Supplementary Table S11.** The top 3 PPI-enriched function regulated by Gonad-Tibolone interactions.

| PPI Cluster              | Gene Ontology   Description   Log10(p);                                                                                                                                                          |
|--------------------------|--------------------------------------------------------------------------------------------------------------------------------------------------------------------------------------------------|
| Fully connected Cluster  | GO:0032271 regulation of protein polymerization -7.9;GO:0032535 regulation of cellular component size -7.3;GO:0097435 supramolecular fiber organization -7.1                                     |
| Antigen Processing       | R-MMU-983168 Antigen processing: Ubiquitination & Proteasome degradation -8.6;R-MMU-983169 Class I MHC mediated antigen processing & presentation -8.0;R-MMU-1280218 Adaptive Immune System -7.5 |
| Translation              | ko03010 Ribosome -12.5;mmu03010 Ribosome -12.5;GO:0006412 translation -12.4                                                                                                                      |
| RAB Signalling           | R-MMU-8873719 RAB geranylgeranylation -15.5;R-MMU-9007101 Rab regulation of trafficking -10.6;R-MMU-8876198 RAB GEFs exchange GTP for GDP on RABs -8.3                                           |
| Endocytosis              | R-MMU-8856828 Clathrin-mediated endocytosis -10.2;R-MMU-199991 Membrane Trafficking -7.2;R-MMU-5653656 Vesicle-mediated transport -7.0                                                           |
| Electron Transport Chain | GO:0042773 ATP synthesis coupled electron transport -12.5;GO:0022904 respiratory electron transport chain -11.9;GO:0022900 electron transport chain -11.7                                        |
| Cytoskeleton             | GO:0045104 intermediate filament cytoskeleton organization -7.8;GO:0045103 intermediate filament-based process -7.8                                                                              |

Full list of all enriched functions is in Supplementary File S2.

**Supplementary Table S12.** Top 20 STRING Enriched Functions regulated by Gonadectomy and Tibolone.

| # background genes | # genes | category              | description                                   | FDR value | p-value  | term name  |
|--------------------|---------|-----------------------|-----------------------------------------------|-----------|----------|------------|
| 1492               | 63      | GO Cellular Component | Synapse                                       | 1.49E-27  | 6.05E-31 | GO:0045202 |
| 10283              | 145     | GO Cellular Component | Cytoplasm                                     | 9.46E-27  | 7.70E-30 | GO:0005737 |
| 1583               | 50      | GO Cellular Component | Neuron projection                             | 2.05E-16  | 8.33E-19 | GO:0043005 |
| 501                | 30      | GO Cellular Component | Glutamatergic synapse                         | 5.89E-16  | 2.69E-18 | GO:0098978 |
| 446                | 24      | GO Cellular Component | Neuron to neuron synapse                      | 1.24E-11  | 8.09E-14 | GO:0098984 |
| 483                | 25      | GO Molecular Function | Structural molecule activity                  | 9.36E-11  | 5.37E-14 | GO:0005198 |
| 212                | 17      | GO Cellular Component | Myelin sheath                                 | 1.70E-10  | 1.17E-12 | GO:0043209 |
| 3573               | 64      | GO Cellular Component | Cytosol                                       | 2.45E-10  | 1.99E-12 | GO:0005829 |
| 2438               | 54      | GO Biological Process | Regulation of cellular component organization | 6.11E-10  | 6.98E-14 | GO:0051128 |
| 4054               | 68      | GO Cellular Component | Non-membrane-bounded organelle                | 6.52E-10  | 5.67E-12 | GO:0043228 |
| 4895               | 76      | GO Cellular Component | Protein-containing complex                    | 6.76E-10  | 6.33E-12 | GO:0032991 |
| 244                | 17      | GO Cellular Component | Synaptic vesicle                              | 9.81E-10  | 9.58E-12 | GO:0008021 |
| 1415               | 36      | GO Cellular Component | Whole membrane                                | 6.52E-09  | 7.69E-11 | GO:0098805 |
| 1776               | 39      | GO Cellular Component | Mitochondrion                                 | 5.45E-08  | 7.19E-10 | GO:0005739 |
| 1310               | 33      | GO Cellular Component | Plasma membrane region                        | 5.45E-08  | 7.10E-10 | GO:0098590 |
| 4769               | 74      | GO Biological Process | Cellular component organization               | 6.81E-08  | 1.58E-11 | GO:0016043 |
| 4646               | 73      | GO Biological Process | Localization                                  | 6.81E-08  | 1.32E-11 | GO:0051179 |
| 2358               | 48      | GO Biological Process | Nervous system development                    | 1.58E-07  | 5.42E-11 | GO:0007399 |
| 753                | 24      | GO Cellular Component | Dendrite                                      | 1.89E-07  | 2.70E-09 | GO:0030425 |
| 4668               | 68      | GO Cellular Component | Cell periphery                                | 2.08E-07  | 3.13E-09 | GO:0071944 |

**Supplementary Table S13.** The top 3 PPI-enriched function regulated by Sex-Gonad-Tibolone interactions.

| PPI Cluster             | Gene Ontology   Description   Log10(p);                                                                                                                                                  |
|-------------------------|------------------------------------------------------------------------------------------------------------------------------------------------------------------------------------------|
| Fully connected Cluster | ko05010   Alzheimer's disease   -9.6; mmu05010   Alzheimer's disease   -9.6; R-MMU-611105   Respiratory electron transport   -8.6                                                        |
| Cellular Metabolism     | R-MMU-422356   Regulation of insulin secretion   -8.4; R-MMU-163685   Integration of energy metabolism   -7.9; R-MMU-418217   G beta:gamma signalling through PLC beta   -7.5            |
| Electron Transfer Chain | R-MMU-611105   Respiratory electron transport   -16.5; WP295   Electron transport chain   -16.3; CORUM:381   Respiratory chain complex I, mitochondrial   -15.8                          |
| Translation             | WP163   Cytoplasmic ribosomal proteins   -13.2; ko03010   Ribosome   -11.6; mmu03010   Ribosome   -11.6                                                                                  |
| WNT Signalling          | R-MMU-195253   Degradation of beta-catenin by the destruction complex   -12.2; R-MMU-201681   TCF dependent signaling in response to WNT   -10.7; R-MMU-195721   Signaling by WNT   -9.8 |
| Prion Disease           | ko05020   Prion diseases   -7.8; mmu05020   Prion diseases   -7.6; ko04514   Cell adhesion molecules (CAMs)   -5.7                                                                       |

Full list of all enriched functions is in Supplementary File S2.

**Supplementary Table S14.** Top 20 STRING Enriched Functions regulated by Sex, Gonadectomy and Tibolone.

| # background genes | # genes | category              | description                            | FDR value | p-value  | term name  |
|--------------------|---------|-----------------------|----------------------------------------|-----------|----------|------------|
| 1492               | 65      | GO Cellular Component | Synapse                                | 1.52E-34  | 6.18E-38 | GO:0045202 |
| 10283              | 121     | GO Cellular Component | Cytoplasm                              | 1.78E-20  | 2.90E-23 | GO:0005737 |
| 501                | 26      | GO Cellular Component | Glutamatergic synapse                  | 6.30E-14  | 2.82E-16 | GO:0098978 |
| 1080               | 34      | GO Cellular Component | Somatodendritic compartment            | 1.57E-12  | 7.64E-15 | GO:0036477 |
| 446                | 23      | GO Cellular Component | Neuron to neuron synapse               | 3.52E-12  | 2.00E-14 | GO:0098984 |
| 4895               | 69      | GO Cellular Component | Protein-containing complex             | 1.81E-10  | 1.47E-12 | GO:0032991 |
| 2973               | 52      | GO Cellular Component | Organelle membrane                     | 2.04E-10  | 1.79E-12 | GO:0031090 |
| 264                | 17      | GO Cellular Component | Exocytic vesicle                       | 2.40E-10  | 2.35E-12 | GO:0070382 |
| 1310               | 32      | GO Cellular Component | Plasma membrane region                 | 3.22E-09  | 3.93E-11 | GO:0098590 |
| 212                | 14      | GO Cellular Component | Myelin sheath                          | 1.23E-08  | 1.65E-10 | GO:0043209 |
| 113                | 11      | GO Cellular Component | Schaffer collateral - CA1 synapse      | 2.54E-08  | 3.62E-10 | GO:0098685 |
| 3382               | 55      | GO Biological Process | Transport                              | 4.68E-08  | 5.34E-12 | GO:0006810 |
| 143                | 12      | KEGG Pathways         | Retrograde endocannabinoid signaling   | 5.77E-08  | 2.73E-10 | mmu04723   |
| 359                | 17      | KEGG Pathways         | Alzheimer disease                      | 5.77E-08  | 2.29E-10 | mmu05010   |
| 1872               | 36      | GO Cellular Component | Cytoplasmic vesicle                    | 8.49E-08  | 1.24E-09 | GO:0031410 |
| 791                | 23      | GO Cellular Component | Axon                                   | 8.85E-08  | 1.39E-09 | GO:0030424 |
| 3573               | 52      | GO Cellular Component | Cytosol                                | 9.53E-08  | 1.60E-09 | GO:0005829 |
| 102                | 10      | GO Cellular Component | GABA-ergic synapse                     | 1.23E-07  | 2.21E-09 | GO:0098982 |
| 1776               | 34      | GO Cellular Component | Mitochondrion                          | 2.49E-07  | 4.56E-09 | GO:0005739 |
| 522                | 20      | GO Biological Process | Regulation of trans-synaptic signaling | 6.78E-07  | 1.94E-10 | GO:0099177 |

**Supplementary Table S15.** Top shared proteins, minimum 4/7 hits across sex, gonads, tibolone and interactions.

| Gene id | Protein name | Gonad-Tibolone | Gonad | Sex-Gonad | Sex-Gonad-Tibolone | Sex-Tibolone | Sex | Tibolone |
|---------|--------------|----------------|-------|-----------|--------------------|--------------|-----|----------|
| 210274  | Shank2       | 1              | 1     | 1         | 1                  | 0            | 1   | 0        |
| 66588   | Cmpk1        | 0              | 1     | 1         | 1                  | 0            | 1   | 1        |
| 13383   | Dlg1         | 1              | 1     | 0         | 0                  | 1            | 1   | 1        |
| 57440   | Ehd3         | 0              | 1     | 1         | 1                  | 1            | 1   | 0        |
| 68278   | Ddx39        | 1              | 1     | 0         | 0                  | 0            | 1   | 1        |
| 13589   | Mapre1       | 1              | 1     | 0         | 0                  | 0            | 1   | 1        |
| 225887  | Ndufs8       | 1              | 1     | 1         | 1                  | 0            | 0   | 0        |
| 243616  | Slc6a11      | 1              | 0     | 0         | 1                  | 1            | 1   | 0        |
| 12408   | Cbr1         | 1              | 0     | 0         | 1                  | 1            | 1   | 0        |
| 68051   | Nutf2        | 1              | 1     | 0         | 1                  | 0            | 0   | 1        |
| 11363   | Acadl        | 1              | 0     | 1         | 0                  | 1            | 1   | 0        |
| 108069  | Grm3         | 1              | 0     | 1         | 1                  | 0            | 0   | 1        |
| 11771   | Ap2a1        | 0              | 1     | 1         | 1                  | 0            | 1   | 0        |
| 67059   | Ola1         | 1              | 1     | 0         | 0                  | 0            | 1   | 1        |
| 17967   | Ncam1        | 0              | 0     | 0         | 1                  | 1            | 1   | 1        |
| 20527   | Slc2a3       | 0              | 1     | 0         | 1                  | 1            | 0   | 1        |
| 54127   | Rps28        | 0              | 0     | 0         | 1                  | 1            | 1   | 1        |
| 13167   | Dbi          | 0              | 1     | 0         | 1                  | 1            | 1   | 0        |
| 12331   | Cap1         | 1              | 1     | 0         | 0                  | 0            | 1   | 1        |
| 11765   | Ap1g1        | 0              | 1     | 0         | 0                  | 1            | 1   | 1        |
| 748685  | Tmem65       | 0              | 1     | 1         | 0                  | 1            | 1   | 0        |
| 76308   | Rab1b        | 1              | 0     | 0         | 1                  | 1            | 1   | 0        |
| 18293   | Ogdh         | 1              | 1     | 1         | 0                  | 0            | 0   | 1        |

Full list of all enriched functions is in Supplementary File S4.

**Supplementary Table S16.** Top 20 Clusters of Enriched functions, represented by the most significantly enriched function per cluster.

| Category                | Term          | Description                                 | LogP     | Log(q-value) | Input Proteins / Proteins in Term |
|-------------------------|---------------|---------------------------------------------|----------|--------------|-----------------------------------|
| KEGG Pathway            | ko05010       | Alzheimer's disease                         | -26.3099 | -22.329      | 44/175                            |
| Reactome Gene Sets      | R-MMU-8953854 | Metabolism of RNA                           | -25.4256 | -21.746      | 74/546                            |
| Reactome Gene Sets      | R-MMU-2262752 | Cellular responses to stress                | -22.0701 | -19.019      | 66/499                            |
| GO Biological Processes | GO:1903827    | regulation of cellular protein localization | -21.1179 | -18.137      | 69/564                            |
| GO Biological Processes | GO:0099003    | vesicle-mediated transport in synapse       | -20.9081 | -17.969      | 46/256                            |
| GO Biological Processes | GO:0099177    | regulation of trans-synaptic signaling      | -20.652  | -17.761      | 75/669                            |
| GO Biological Processes | GO:0032990    | cell part morphogenesis                     | -20.5667 | -17.716      | 80/753                            |
| GO Biological Processes | GO:0072657    | protein localization to membrane            | -19.5269 | -16.764      | 69/602                            |
| GO Biological Processes | GO:0032535    | regulation of cellular component size       | -18.3142 | -15.623      | 55/418                            |
| Reactome Gene Sets      | R-MMU-5653656 | Vesicle-mediated transport                  | -17.8161 | -15.147      | 64/566                            |
| Reactome Gene Sets      | R-MMU-112315  | Transmission across Chemical Synapses       | -17.4014 | -14.773      | 36/188                            |
| KEGG Pathway            | ko01200       | Carbon metabolism                           | -17.2198 | -14.628      | 29/118                            |
| GO Biological Processes | GO:0050808    | synapse organization                        | -17.0503 | -14.467      | 58/491                            |
| GO Biological Processes | GO:0098655    | cation transmembrane transport              | -16.7635 | -14.198      | 75/781                            |
| Reactome Gene Sets      | R-MMU-6798695 | Neutrophil degranulation                    | -16.6403 | -14.091      | 58/501                            |

|                         |               |                                                    |          |         |        |
|-------------------------|---------------|----------------------------------------------------|----------|---------|--------|
| Reactome Gene Sets      | R-MMU-9716542 | Signaling by Rho GTPases, Miro GTPases and RHOBTB3 | -15.4032 | -12.979 | 66/667 |
| Reactome Gene Sets      | R-MMU-422475  | Axon guidance                                      | -15.255  | -12.848 | 39/256 |
| KEGG Pathway            | mmu04720      | Long-term potentiation                             | -12.5916 | -10.447 | 19/68  |
| GO Biological Processes | GO:0051640    | organelle localization                             | -12.2354 | -10.144 | 54/559 |
| Reactome Gene Sets      | R-MMU-8856828 | Clathrin-mediated endocytosis                      | -11.9987 | -9.924  | 25/134 |

Full list of all enriched functions is in Supplementary File S4.

**Supplementary Table S17.** Alzheimer's cluster of enriched functions.

| Category                | Term          | Description                                                                                                         | LogP     | Log(q-value) | Input Proteins / Proteins in Term |
|-------------------------|---------------|---------------------------------------------------------------------------------------------------------------------|----------|--------------|-----------------------------------|
| KEGG Pathway            | ko05010       | Alzheimer's disease                                                                                                 | -26.3099 | -22.329      | 44/175                            |
| KEGG Pathway            | mmu05010      | Alzheimer's disease                                                                                                 | -26.3099 | -22.329      | 44/175                            |
| Reactome Gene Sets      | R-MMU-1428517 | The citric acid (TCA) cycle and respiratory electron transport                                                      | -25.9495 | -22.145      | 43/169                            |
| KEGG Pathway            | ko05016       | Huntington's disease                                                                                                | -22.5717 | -19.440      | 42/192                            |
| KEGG Pathway            | mmu05016      | Huntington's disease                                                                                                | -22.5717 | -19.440      | 42/192                            |
| GO Biological Processes | GO:0009060    | aerobic respiration                                                                                                 | -20.7288 | -17.809      | 37/161                            |
| GO Biological Processes | GO:0006091    | generation of precursor metabolites and energy                                                                      | -20.6453 | -17.761      | 59/428                            |
| KEGG Pathway            | ko00190       | Oxidative phosphorylation                                                                                           | -20.5743 | -17.716      | 34/134                            |
| GO Biological Processes | GO:0045333    | cellular respiration                                                                                                | -19.6785 | -16.888      | 41/215                            |
| KEGG Pathway            | mmu05012      | Parkinson's disease                                                                                                 | -18.5047 | -15.782      | 33/144                            |
| GO Biological Processes | GO:0015980    | energy derivation by oxidation of organic compounds                                                                 | -18.496  | -15.782      | 47/305                            |
| WikiPathways            | WP295         | Electron transport chain                                                                                            | -17.3357 | -14.717      | 27/99                             |
| Reactome Gene Sets      | R-MMU-163200  | Respiratory electron transport, ATP synthesis by chemiosmotic coupling, and heat production by uncoupling proteins. | -17.2198 | -14.628      | 29/118                            |

|                         |               |                                                        |           |         |        |
|-------------------------|---------------|--------------------------------------------------------|-----------|---------|--------|
| Reactome Gene Sets      | R-MMU-611105  | Respiratory electron transport                         | - 16.8831 | -14.309 | 26/94  |
| KEGG Pathway            | mmu00190      | Oxidative phosphorylation                              | - 15.5254 | -13.089 | 34/190 |
| GO Biological Processes | GO:0046034    | ATP metabolic process                                  | - 14.3315 | -11.984 | 38/259 |
| GO Biological Processes | GO:0006119    | oxidative phosphorylation                              | - 13.7829 | -11.488 | 25/113 |
| CORUM                   | CORUM:382     | Respiratory chain complex I, mitochondrial             | - 13.4784 | -11.205 | 16/40  |
| CORUM                   | CORUM:381     | Respiratory chain complex I, mitochondrial             | - 12.7759 | -10.594 | 15/37  |
| GO Biological Processes | GO:0022900    | electron transport chain                               | - 12.6379 | -10.490 | 22/95  |
| GO Biological Processes | GO:0022904    | respiratory electron transport chain                   | - 12.4724 | -10.355 | 21/87  |
| KEGG Pathway            | ko04932       | Non-alcoholic fatty liver disease (NAFLD)              | - 10.8009 | -8.852  | 25/151 |
| GO Biological Processes | GO:0042773    | ATP synthesis coupled electron transport               | - 10.5914 | -8.668  | 17/67  |
| WikiPathways            | WP1248        | Oxidative phosphorylation                              | - 10.4833 | -8.569  | 16/59  |
| KEGG Pathway            | mmu04932      | Non-alcoholic fatty liver disease (NAFLD)              | - 10.2893 | -8.388  | 26/172 |
| GO Biological Processes | GO:0042775    | mitochondrial ATP synthesis coupled electron transport | - 9.78985 | -7.939  | 16/65  |
| GO Biological Processes | GO:0019646    | aerobic electron transport chain                       | - 9.08302 | -7.290  | 14/53  |
| GO Biological Processes | GO:0010257    | NADH dehydrogenase complex assembly                    | - 8.62936 | -6.871  | 14/57  |
| GO Biological Processes | GO:0032981    | mitochondrial respiratory chain complex I assembly     | - 8.62936 | -6.871  | 14/57  |
| Reactome Gene Sets      | R-MMU-6799198 | Complex I biogenesis                                   | - 8.62936 | -6.871  | 14/57  |

|                         |            |                                                      |          |        |       |
|-------------------------|------------|------------------------------------------------------|----------|--------|-------|
| GO Biological Processes | GO:0006120 | mitochondrial electron transport, NADH to ubiquinone | -6.70989 | -5.078 | 9/29  |
| GO Biological Processes | GO:0033108 | mitochondrial respiratory chain complex assembly     | -6.6424  | -5.021 | 15/92 |

Full list of all enriched functions is in Supplementary File S4.

**Supplementary Table S18.** The top 3 PPI-enriched function regulated by merged lists of proteins regulated by Sex, Gonads, Tibolone and interactions.

| PPI Cluster                         | Gene Ontology   Description  Log10(p);                                                                                                                                                                                     |
|-------------------------------------|----------------------------------------------------------------------------------------------------------------------------------------------------------------------------------------------------------------------------|
| Fully connected Cluster             | GO:0009060 aerobic respiration -13.3;mmu05010 Alzheimer's disease -12.6;ko05010 Alzheimer's disease -12.6                                                                                                                  |
| Oxidative Phosphorylation           | ko00190 Oxidative phosphorylation -16.7;mmu00190 Oxidative phosphorylation -14.7;mmu05016 Huntington's disease -13.1                                                                                                       |
| RAF/MAP Kinase Cascade              | R-MMU-5673000 RAF activation -7.7;GO:0051668 localization within membrane -7.4;R-MMU-5673001 RAF/MAP kinase cascade -7.2                                                                                                   |
| Translation                         | R-MMU-1799339 SRP-dependent cotranslational protein targeting to membrane -22.7;R-MMU-975956 Nonsense Mediated Decay (NMD) independent of the Exon Junction Complex (EJC) -22.6;WP163 Cytoplasmic ribosomal proteins -22.3 |
| Muscle Contraction                  | GO:0003012 muscle system process -5.6;GO:0006936 muscle contraction -4.6;ko04921 Oxytocin signaling pathway -4.1                                                                                                           |
| Citric Acid Cycle                   | GO:0009060 aerobic respiration -6.6;R-MMU-1428517 The citric acid (TCA) cycle and respiratory electron transport -6.5;GO:0045333 cellular respiration -6.1                                                                 |
| Dicarboxylic Acid Metabolic Process | GO:0043648 dicarboxylic acid metabolic process -7.1                                                                                                                                                                        |
| Cytoskeleton                        | GO:0030048 actin filament-based movement -6.6;GO:0007015 actin filament organization -5.0;GO:0030036 actin cytoskeleton organization -4.4                                                                                  |

Full list of all enriched functions is in Supplementary File S2.
